# Supplementary material for: Surgical treatment for infective endocarditis in the ageing society: a nationwide retrospective study in Japan
Source: HighWire-hosted journal article supplement (doi:10.1136/openhrt-2021-001627), 2021-04-01
Supplement: openhrt-2021-001627supp001_data_supplement.pdf [file openhrt-2021-001627supp001_data_supplement.pdf]

**Supplemental Table 1. ICD-10 Codes Used to Define Etiology**

| Etiology                                                                                                      | ICD-10 codes                                                                        |
|---------------------------------------------------------------------------------------------------------------|-------------------------------------------------------------------------------------|
| Infective endocarditis                                                                                        | I38, I01.0, I01.1, I07.8, I33.0, I33.9, I39.8                                       |
| Hypertension                                                                                                  | I10, I11, I12, I13, I15                                                             |
| Diabetes mellitus                                                                                             | E10, E11, E12, E13, E14                                                             |
| Dyslipidemia                                                                                                  | E78                                                                                 |
| Atrial fibrillation                                                                                           | I48                                                                                 |
| Malignancy                                                                                                    | C, D00, D01, D02, D03, D04, D05, D06, D07, D08, D09                                 |
| Chronic pulmonary disease                                                                                     | I27, J40, J41, J42, J43, J44, J45, J47, J60, J61, J62, J63, J64, J65, J66, J67, J70 |
| Chronic liver disease                                                                                         | B18, K70, K71, K72, K73, K74, K76                                                   |
| Chronic renal disease                                                                                         | N18                                                                                 |
| Heart failure                                                                                                 | I50.0, I50.1, I50.9                                                                 |
| Stroke                                                                                                        |                                                                                     |
| - Ischemic                                                                                                    | I63                                                                                 |
| - Hemorrhagic                                                                                                 | I60, I61, I62                                                                       |
| Embolism                                                                                                      |                                                                                     |
| - Coronary                                                                                                    | I21, I22                                                                            |
| - Spleen                                                                                                      | D73.5                                                                               |
| - Kidney                                                                                                      | N28.0                                                                               |
| - Lung                                                                                                        | I26                                                                                 |
| - Abdominal artery                                                                                            | K55.0                                                                               |
| - Extremities                                                                                                 | I26                                                                                 |
| Shock                                                                                                         | R57                                                                                 |
| DIC                                                                                                           | D65                                                                                 |
| ICD-10, International Classification of Diseases, 10th Revision; DIC, Disseminated intravascular coagulation. |                                                                                     |
