# Supplementary material for: Surgical treatment for infective endocarditis in the ageing society: a nationwide retrospective study in Japan
Source: HighWire-hosted journal article supplement (doi:10.1136/openhrt-2021-001627), 2021-04-01
Supplement: openhrt-2021-001627supp002_data_supplement.pdf [file openhrt-2021-001627supp002_data_supplement.pdf]

**Supplemental Table 2a. Unmatched and Propensity-matched Patient Characteristics (<65 years)**

| Variables                   | Unmatched Cohort   |                    |        | Propensity-matched Cohort |                    |        |
|-----------------------------|--------------------|--------------------|--------|---------------------------|--------------------|--------|
|                             | Surgical treatment | Surgical treatment | SMD    | Surgical treatment        | Surgical treatment | SMD    |
|                             | (-)<br>(n = 4,909) | (+)<br>(n = 2,894) |        | (-)<br>(n = 1,785)        | (+)<br>(n = 1,785) |        |
| Age, years                  | 51 [39-59]         | 51[41-59]          | 0.04   | 52 [40-59]                | 51 [41-59]         | 0.009  |
| Male gender                 | 3,384 (68.9%)      | 2,124 (73.4%)      | 0.099  | 1,284 (71.9%)             | 1,287 (72.1%)      | 0.004  |
| BMI, kg/m <sup>2</sup>      |                    |                    |        |                           |                    |        |
| <18.5 kg/m <sup>2</sup>     | 845 (17.2%)        | 574 (19.8%)        | 0.068  | 336 (18.8%)               | 347 (19.4%)        | 0.016  |
| 18.5-24.9 kg/m <sup>2</sup> | 2,707 (55.1%)      | 1,686 (58.3%)      | 0.063  | 1,032 (57.8%)             | 1,032 (57.8%)      | 0.000  |
| 25.0-29.9 kg/m <sup>2</sup> | 769 (15.7%)        | 428 (14.8%)        | -0.024 | 267 (15.0%)               | 259 (14.5%)        | -0.013 |
| ≥30 kg/m <sup>2</sup>       | 239 (4.9%)         | 92 (3.2%)          | -0.086 | 61 (3.4%)                 | 62 (3.5%)          | 0.003  |
| Missing                     | 349 (7.1%)         | 114 (3.9%)         | -0.139 | 89 (5.0%)                 | 85 (4.8%)          | -0.010 |
| Smoking                     | 2,305 (47.0%)      | 1,536 (53.1%)      | 0.123  | 911 (51.0%)               | 908 (50.9%)        | -0.003 |
| Barthel Index               |                    |                    |        |                           |                    |        |
| Total dependence            | 668 (13.6%)        | 581 (20.1%)        | 0.173  | 281 (15.7%)               | 268 (15.0%)        | -0.020 |
| Severe dependence           | 143 (2.9%)         | 118 (4.1%)         | 0.063  | 64 (3.6%)                 | 60 (3.4%)          | -0.012 |
| Moderate dependence         | 236 (4.8%)         | 140 (4.8%)         | 0.001  | 90 (5.0%)                 | 87 (4.9%)          | -0.008 |
| Mild dependence             | 573 (11.7%)        | 317 (11.0%)        | -0.023 | 196 (11.0%)               | 208 (11.7%)        | 0.021  |
| Independence                | 2726 (55.5%)       | 1302 (45.0%)       | -0.212 | 925 (51.8%)               | 935 (5.2%)         | 0.011  |
| Missing                     | 563 (11.5%)        | 436 (15.1%)        | 0.106  | 229 (12.8%)               | 227 (12.7%)        | -0.003 |
| JCS                         |                    |                    |        |                           |                    |        |
| 0 (alert)                   | 4,254 (86.7%)      | 2,484 (85.8%)      | -0.024 | 1,543 (86.4%)             | 1,540 (86.3%)      | -0.005 |
| 1-3 (drowsy)                | 441 (9.0%)         | 269 (9.3%)         | 0.011  | 157 (8.8%)                | 156 (8.7%)         | -0.002 |
| 10-30 (somnolence)          | 117 (2.4%)         | 79 (2.7%)          | 0.022  | 48 (2.7%)                 | 50 (2.8%)          | 0.007  |

|                                         |               |               |        |               |               |        |
|-----------------------------------------|---------------|---------------|--------|---------------|---------------|--------|
| 100-300 (coma)                          | 97 (2.0%)     | 62 (2.1%)     | 0.012  | 37 (2.1%)     | 39 (2.2%)     | 0.008  |
| Admission year                          |               |               |        |               |               |        |
| 2010                                    | 299 (6.1%)    | 178 (6.2%)    | 0.002  | 106 (5.9%)    | 109 (6.1%)    | 0.007  |
| 2011                                    | 562 (11.4%)   | 271 (9.4%)    | -0.068 | 186 (10.4%)   | 174 (9.7%)    | -0.022 |
| 2012                                    | 598 (12.2%)   | 378 (13.1%)   | 0.026  | 220 (12.3%)   | 222 (12.4%)   | 0.003  |
| 2013                                    | 613 (12.5%)   | 379 (13.1%)   | 0.018  | 253 (14.2%)   | 239 (13.4%)   | -0.023 |
| 2014                                    | 696 (14.2%)   | 428 (14.8%)   | 0.017  | 268 (15.0%)   | 268 (15.0%)   | 0.000  |
| 2015                                    | 652 (13.3%)   | 386 (13.3%)   | 0.002  | 228 (12.8%)   | 233 (13.1%)   | 0.008  |
| 2016                                    | 695 (14.2%)   | 398 (13.8%)   | -0.012 | 240 (13.4%)   | 244 (13.7%)   | 0.007  |
| 2017                                    | 700 (14.3%)   | 434 (15.0%)   | 0.021  | 260 (14.6%)   | 269 (15.1%)   | 0.014  |
| 2018                                    | 94 (1.9%)     | 42 (1.5%)     | -0.036 | 24 (1.3%)     | 27 (1.5%)     | 0.014  |
| Hospital Volume                         |               |               |        |               |               |        |
| Low (<4)                                | 176 (3.6%)    | 7 (0.2%)      | -0.246 | 6 (0.3%)      | 7 (0.4%)      | 0.009  |
| Middle (4≤ & <14)                       | 916 (18.7%)   | 117 (4.0%)    | -0.474 | 86 (4.8%)     | 104 (5.8%)    | 0.045  |
| High (≥14)                              | 3,817 (77.8%) | 2,770 (95.7%) | 0.549  | 1,693 (94.8%) | 1,674 (93.8%) | -0.046 |
| Clinical training hospital              | 4,157 (84.7%) | 2,663 (92.0%) | 0.230  | 1,632 (91.4%) | 1,620 (90.8%) | -0.024 |
| Emergent admission                      | 3,603 (73.4%) | 2,271 (78.5%) | 0.119  | 1,341 (75.1%) | 1,337 (74.9%) | -0.005 |
| <b><i>Comorbid conditions</i></b>       |               |               |        |               |               |        |
| Hypertension                            | 992 (20.2%)   | 705 (24.4%)   | 0.100  | 426 (23.9%)   | 420 (23.5%)   | -0.008 |
| Diabetes Mellitus                       | 676 (13.8%)   | 392 (13.5%)   | -0.007 | 227 (12.7%)   | 248 (13.9%)   | 0.035  |
| Dyslipidemia                            | 343 (7.0%)    | 194 (6.7%)    | -0.011 | 143 (8.0%)    | 131 (7.3%)    | -0.025 |
| Atrial Fibrillation                     | 248 (5.1%)    | 175 (6.0%)    | 0.043  | 106 (5.9%)    | 105 (5.9%)    | -0.002 |
| Malignancy                              | 173(3.5%)     | 51 (1.8%)     | -0.110 | 49 (2.7%)     | 42 (2.4%)     | -0.025 |
| Chronic Pulmonary Disease               | 135 (2.8%)    | 56 (1.9%)     | -0.054 | 42 (2.4%)     | 43 (2.4%)     | 0.004  |
| Chronic Liver Disease                   | 266 (5.4%)    | 95 (3.3%)     | -0.105 | 69 (3.9%)     | 65 (3.6%)     | -0.012 |
| Chronic Renal Disease                   | 359(7.3%)     | 170 (5.9%)    | -0.058 | 126 (7.1%)    | 122 (6.8%)    | -0.009 |
| <b><i>In-hospital Complications</i></b> |               |               |        |               |               |        |

|                                                                 |               |               |        |             |             |        |
|-----------------------------------------------------------------|---------------|---------------|--------|-------------|-------------|--------|
| Heart failure                                                   | 1,212 (24.7%) | 1,102 (38.1%) | 0.292  | 577 (32.3%) | 581 (32.5%) | 0.005  |
| - NYHA II                                                       | 200 (4.1%)    | 185 (6.4%)    | 0.104  | 108 (6.1%)  | 109 (6.1%)  | 0.002  |
| - NYHA III                                                      | 114 (2.3%)    | 160 (5.5%)    | 0.166  | 73 (4.1%)   | 75 (4.2%)   | 0.006  |
| - NYHA IV                                                       | 81 (1.7%)     | 161 (5.6%)    | 0.211  | 56 (3.1%)   | 58 (3.2%)   | 0.006  |
| Stroke                                                          | 558 (11.4%)   | 513 (17.7%)   | 0.181  | 272 (15.2%) | 265 (14.8%) | -0.011 |
| Embolism                                                        | 208 (4.2%)    | 183 (6.3%)    | 0.093  | 98 (5.5%)   | 93 (5.2%)   | -0.012 |
| Shock                                                           | 45 (0.9%)     | 104 (3.6%)    | 0.181  | 35 (2.0%)   | 40 (2.2%)   | 0.020  |
| DIC                                                             | 151 (3.1%)    | 115 (4.0%)    | 0.049  | 55 (3.1%)   | 61 (3.4%)   | 0.019  |
| <b><i>Antibiotics for more than 2 weeks</i></b>                 |               |               |        |             |             |        |
| Penicillin system                                               | 1,781 (36.3%) | 1,583 (54.7%) | 0.376  | 934 (52.3%) | 922 (51.7%) | -0.013 |
| Cephem system                                                   | 1,282 (26.1%) | 1,207 (41.7%) | 0.334  | 659 (36.9%) | 654 (36.6%) | -0.006 |
| Carbapenem                                                      | 260 (5.3%)    | 340 (11.7%)   | 0.233  | 163 (9.1%)  | 152 (8.5%)  | -0.022 |
| Aminoglycoside                                                  | 1,512 (30.8%) | 1,449 (50.1%) | 0.400  | 855 (47.9%) | 849 (47.6%) | -0.007 |
| Glycopeptide                                                    | 541 (11.0%)   | 696 (24.0%)   | 0.348  | 335 (18.8%) | 326 (18.3%) | -0.013 |
| Daptomycin                                                      | 130 (2.6%)    | 145 (5.0%)    | 0.123  | 73 (4.1%)   | 70 (3.9%)   | -0.009 |
| Linezolid                                                       | 49 (1.0%)     | 93 (3.2%)     | 0.155  | 39 (2.2%)   | 40 (2.2%)   | 0.004  |
| Antifungal antibiotics                                          | 46 (0.9%)     | 85 (2.9%)     | 0.145  | 33 (1.8%)   | 30 (1.7%)   | -0.013 |
| <b><i>Intensive Treatment within 2 days after admission</i></b> |               |               |        |             |             |        |
| Admission to HCU                                                | 148 (3.0%)    | 118 (4.1%)    | 0.057  | 67 (3.8%)   | 64 (3.6%)   | -0.009 |
| Admission to ICU                                                | 317 (6.5%)    | 938 (32.4%)   | 0.694  | 251 (14.1%) | 227 (12.7%) | -0.039 |
| Inotropic therapy                                               | 336 (6.8%)    | 900(31.1%)    | 0.650  | 234 (13.1%) | 207 (11.6%) | -0.046 |
| Ventilation Support                                             | 203 (4.1%)    | 551 (19.0%)   | 0.479  | 139 (7.8%)  | 129 (7.2%)  | -0.021 |
| CRRT                                                            | 49 (1.0%)     | 86 (3.0%)     | 0.142  | 35 (2.0%)   | 34 (1.9%)   | -0.004 |
| IRRT                                                            | 247 (5.0%)    | 101 (3.5%)    | -0.076 | 82 (4.6%)   | 74 (4.1%)   | -0.022 |
| PMX-DHP                                                         | 17 (0.3%)     | 19 (0.7%)     | 0.044  | 9 (0.5%)    | 8 (0.4%)    | -0.008 |

---

Data are expressed as the median [interquartile range] or number (percentage). SMD, standardized mean difference; BMI, Body mass index; JCS, Japan Coma Scale; NYHA, New York Heart Association; DIC, Disseminated intravascular coagulation; HCU, high care unit; ICU, intensive care unit; CRRT, continuous renal replacement therapy; IRRT, intermittent renal replacement therapy; PMX-DHP, Polymyxin B-immobilized fiber column-direct hemoperfusion.

---

**Supplemental Table 2b. Unmatched and Propensity-matched Patient Characteristics (65 to 79 years)**

| Variables                   | Unmatched Cohort   |                    |        | Propensity-matched Cohort |                    |        |
|-----------------------------|--------------------|--------------------|--------|---------------------------|--------------------|--------|
|                             | Surgical treatment | Surgical treatment | SMD    | Surgical treatment        | Surgical treatment | SMD    |
|                             | (-)<br>(n = 5,628) | (+)<br>(n = 2,246) |        | (-)<br>(n = 1,625)        | (+)<br>(n = 1,625) |        |
| Age, years                  | 73 [69-76]         | 71 [68-75]         | -0.209 | 72 [68-75]                | 72 [68-75]         | -0.005 |
| Male gender                 | 3,440(61.1%)       | 1,459(65.0%)       | 0.080  | 1038 (63.9%)              | 1,043 (64.2%)      | 0.006  |
| BMI, kg/m <sup>2</sup>      |                    |                    |        |                           |                    |        |
| <18.5 kg/m <sup>2</sup>     | 957 (17.0%)        | 397 (17.7%)        | 0.018  | 280 (17.2%)               | 274 (16.9%)        | -0.010 |
| 18.5-24.9 kg/m <sup>2</sup> | 3,296 (58.6%)      | 1,382 (61.5%)      | 0.061  | 999 (61.5%)               | 985 (60.6%)        | -0.018 |
| 25.0-29.9 kg/m <sup>2</sup> | 761 (13.5%)        | 298 (13.3%)        | -0.007 | 226 (13.9%)               | 228 (14%)          | 0.004  |
| ≥30 kg/m <sup>2</sup>       | 147 (2.6%)         | 66 (2.9%)          | 0.020  | 43 (2.6%)                 | 52 (3.2%)          | 0.033  |
| Missing                     | 467 (8.3%)         | 103 (4.6%)         | -0.152 | 77 (4.7%)                 | 86 (5.3%)          | 0.025  |
| Smoking                     | 2,312(41.1%)       | 977 (43.5%)        | 0.049  | 696 (42.8%)               | 706 (43.4%)        | 0.012  |
| Barthel Index               |                    |                    |        |                           |                    |        |
| Total dependence            | 1,335 (23.7%)      | 565 (25.2%)        | 0.033  | 362 (22.3%)               | 366 (22.5%)        | 0.006  |
| Severe dependence           | 266 (4.7%)         | 107 (4.8%)         | 0.002  | 78 (4.8%)                 | 75 (4.6%)          | -0.009 |
| Moderate dependence         | 430 (7.6%)         | 159 (7.1%)         | -0.021 | 131(8.1%)                 | 124 (7.6%)         | -0.016 |
| Mild dependence             | 656 (11.7%)        | 200 (8.9%)         | -0.091 | 156 (9.6%)                | 156 (9.6%)         | 0.000  |
| Independence                | 1996 (35.5%)       | 772 (34.4%)        | -0.023 | 593 (36.5%)               | 608 (37.4%)        | 0.019  |
| Missing                     | 945 (16.8%)        | 443 (19.7%)        | 0.076  | 305 (18.8%)               | 296 (18.2%)        | -0.014 |
| JCS                         |                    |                    |        |                           |                    |        |
| 0 (alert)                   | 4,473 (79.5%)      | 1,868 (83.2%)      | 0.095  | 1,378 (84.8%)             | 1,357 (83.5%)      | -0.035 |
| 1-3 (drowsy)                | 783 (13.9%)        | 275 (12.2%)        | -0.050 | 179 (11%)                 | 189 (11.6%)        | 0.019  |
| 10-30 (somnolence)          | 228 (4.1%)         | 56 (2.5%)          | -0.088 | 40 (2.5%)                 | 45 (2.8%)          | 0.019  |
| 100-300 (coma)              | 144 (2.6%)         | 47 (2.1%)          | -0.031 | 28 (1.7%)                 | 34 (2.1%)          | 0.027  |

## Admission year

|      |             |             |        |             |             |        |
|------|-------------|-------------|--------|-------------|-------------|--------|
| 2010 | 317 (5.6%)  | 115 (5.1%)  | -0.023 | 90 (5.5%)   | 80 (4.9%)   | -0.028 |
| 2011 | 585 (10.4%) | 152 (6.8%)  | -0.130 | 123 (7.6%)  | 123 (7.6%)  | 0.000  |
| 2012 | 646 (11.5%) | 273 (12.2%) | 0.021  | 193 (11.9%) | 194 (11.9%) | 0.002  |
| 2013 | 631 (11.2%) | 278 (12.4%) | 0.036  | 199 (12.2%) | 199 (12.2%) | 0.000  |
| 2014 | 738 (13.1%) | 331 (14.7%) | 0.047  | 226 (13.9%) | 239 (14.7%) | 0.023  |
| 2015 | 826 (14.7%) | 327 (14.6%) | -0.003 | 216 (13.3%) | 223 (13.7%) | 0.013  |
| 2016 | 894 (15.9%) | 363 (16.2%) | 0.008  | 274 (16.9%) | 262 (16.1%) | -0.020 |
| 2017 | 863 (15.3%) | 373 (16.6%) | 0.035  | 274 (16.9%) | 277 (17%)   | 0.005  |
| 2018 | 128 (2.3%)  | 34 (1.5%)   | -0.056 | 30 (1.8%)   | 28 (1.7%)   | -0.009 |

## Hospital Volume

|                            |               |               |        |               |               |        |
|----------------------------|---------------|---------------|--------|---------------|---------------|--------|
| Low (<4)                   | 254 (4.5%)    | 2 (0.1%)      | -0.298 | 2 (0.1%)      | 2 (0.1%)      | 0.000  |
| Middle (4≤ & <14)          | 1,097 (19.5%) | 116 (5.2%)    | -0.447 | 93 (5.7%)     | 111 (6.8%)    | 0.046  |
| High (≥14)                 | 4,277 (76.0%) | 2,128 (94.7%) | 0.550  | 1,530 (94.2%) | 1,512 (93%)   | -0.045 |
| Clinical training hospital | 4,613 (82.0%) | 2,028 (90.3%) | 0.243  | 1,435 (88.3%) | 1,441 (88.7%) | 0.012  |
| Emergent admission         | 4,382 (77.9%) | 1,781 (79.3%) | 0.035  | 1,251 (77%)   | 1,259 (77.5%) | 0.012  |

**Comorbid conditions**

|                           |               |             |        |             |             |        |
|---------------------------|---------------|-------------|--------|-------------|-------------|--------|
| Hypertension              | 1,671 (29.7%) | 670 (29.8%) | 0.003  | 500 (30.8%) | 500 (30.8%) | 0.000  |
| Diabetes Mellitus         | 1,250 (22.2%) | 416 (18.5%) | -0.092 | 309 (19%)   | 323 (19.9%) | 0.022  |
| Dyslipidemia              | 571 (10.1%)   | 197 (8.8%)  | -0.047 | 166 (10.2%) | 164 (10.1%) | -0.004 |
| Atrial Fibrillation       | 731 (13.0%)   | 300 (13.4%) | 0.011  | 211 (13.0%) | 219(13.5%)  | 0.015  |
| Malignancy                | 503 (8.9%)    | 113 (5.0%)  | -0.154 | 96 (5.9%)   | 95 (5.8%)   | -0.003 |
| Chronic Pulmonary Disease | 211 (3.7%)    | 47 (2.1%)   | -0.098 | 47 (2.9%)   | 40 (2.5%)   | -0.027 |
| Chronic Liver Disease     | 263 (4.7%)    | 64 (2.8%)   | -0.096 | 50 (3.1%)   | 50 (3.1%)   | 0.000  |
| Chronic Renal Disease     | 727 (12.9%)   | 227 (10.1%) | -0.088 | 173 (10.6%) | 171 (10.5%) | -0.004 |

**In-hospital Complications**

|               |               |             |       |           |             |       |
|---------------|---------------|-------------|-------|-----------|-------------|-------|
| Heart failure | 1,722 (30.6%) | 996 (44.3%) | 0.287 | 666 (41%) | 669 (41.2%) | 0.004 |
|---------------|---------------|-------------|-------|-----------|-------------|-------|

|                                                                 |               |               |        |             |             |        |
|-----------------------------------------------------------------|---------------|---------------|--------|-------------|-------------|--------|
| - NYHA II                                                       | 283 (5.0%)    | 137 (6.1%)    | 0.047  | 100 (6.2%)  | 94 (5.8%)   | -0.016 |
| - NYHA III                                                      | 179 (3.2%)    | 140 (6.2%)    | 0.145  | 86 (5.3%)   | 85 (5.2%)   | -0.003 |
| - NYHA IV                                                       | 144 (2.6%)    | 125 (5.6%)    | 0.153  | 75 (4.6%)   | 67 (4.1%)   | -0.024 |
| Stroke                                                          | 686 (12.2%)   | 325 (14.5%)   | 0.067  | 220 (13.5%) | 219 (13.5%) | -0.002 |
| Embolism                                                        | 152 (2.7%)    | 65 (2.9%)     | 0.012  | 52 (3.2%)   | 46 (2.8%)   | -0.022 |
| Shock                                                           | 57 (1.0%)     | 84 (3.7%)     | 0.180  | 33 (2%)     | 37 (2.3%)   | 0.017  |
| DIC                                                             | 176 (3.1%)    | 101 (4.5%)    | 0.072  | 56 (3.4%)   | 59 (3.6%)   | 0.010  |
| <b><i>Antibiotics for more than 2 weeks</i></b>                 |               |               |        |             |             |        |
| Penicillin system                                               | 1,953 (34.7%) | 1,224 (54.5%) | 0.406  | 874 (53.8%) | 853 (52.5%) | -0.026 |
| Cephem system                                                   | 1,383 (24.6%) | 819 (36.5%)   | 0.260  | 564 (34.7%) | 545 (33.5%) | -0.025 |
| Carbapenem                                                      | 349 (6.2%)    | 338 (15.0%)   | 0.290  | 167 (10.3%) | 179 (11%)   | 0.024  |
| Aminoglycoside                                                  | 1,496 (26.6%) | 972 (43.3%)   | 0.356  | 696 (42.8%) | 666 (41%)   | -0.037 |
| Glycopeptide                                                    | 776 (13.8%)   | 676 (30.1%)   | 0.402  | 405 (24.9%) | 393 (24.2%) | -0.017 |
| Daptomycin                                                      | 152 (2.7%)    | 146 (6.5%)    | 0.182  | 88 (5.4%)   | 81 (5.0%)   | -0.019 |
| Linezolid                                                       | 39 (0.7%)     | 80 (3.6%)     | 0.200  | 28 (1.7%)   | 27 (1.7%)   | -0.005 |
| Antifungal antibiotics                                          | 93 (1.7%)     | 144 (6.4%)    | 0.244  | 55 (3.4%)   | 59 (3.6%)   | 0.013  |
| <b><i>Intensive Treatment within 2 days after admission</i></b> |               |               |        |             |             |        |
| Admission to HCU                                                | 209 (3.7%)    | 96 (4.3%)     | 0.029  | 68 (4.2%)   | 67 (4.1%)   | -0.003 |
| Admission to ICU                                                | 410 (7.3%)    | 645 (28.7%)   | 0.581  | 248 (15.3%) | 248 (15.3%) | 0.000  |
| Inotropic therapy                                               | 499 (8.9%)    | 706 (31.4%)   | 0.586  | 293 (18%)   | 289 (17.8%) | -0.006 |
| Ventilation Support                                             | 267 (4.7%)    | 407 (18.1%)   | 0.430  | 141 (8.7%)  | 151 (9.3%)  | 0.022  |
| CRRT                                                            | 91 (1.6%)     | 84 (3.7%)     | 0.132  | 37 (2.3%)   | 42 (2.6%)   | 0.020  |
| IRRT                                                            | 386 (6.9%)    | 112 (5.0%)    | -0.079 | 96 (5.9%)   | 91 (5.6%)   | -0.013 |
| PMX-DHP                                                         | 16 (0.3%)     | 13 (0.6%)     | 0.045  | 5 (0.3%)    | 4 (0.2%)    | -0.012 |

Data are expressed as the median [interquartile range] or number (percentage). SMD, standardized mean difference; BMI, Body mass index; JCS, Japan Coma Scale; NYHA, New York Heart Association; DIC, Disseminated intravascular coagulation; HCU, high care unit; ICU,

---

intensive care unit; CRRT, continuous renal replacement therapy; IRRT, intermittent renal replacement therapy; PMX-DHP, Polymyxin B-immobilized fiber column-direct hemoperfusion.

---



**Supplemental Table 2c. Unmatched and Propensity-matched Patient Characteristics (≥80 years)**

| Variables                   | Unmatched Cohort   |                    |        | Propensity-matched Cohort |                    |        |
|-----------------------------|--------------------|--------------------|--------|---------------------------|--------------------|--------|
|                             | Surgical treatment | Surgical treatment | SMD    | Surgical treatment        | Surgical treatment | SMD    |
|                             | (-)<br>(n = 4,525) | (+)<br>(n = 465)   |        | (-)<br>(n = 414)          | (+)<br>(n = 414)   |        |
| Age, years                  | 85 [82-88]         | 82 [81-84]         | -0.825 | 82 [81-84]                | 82 [81-84]         | 0.046  |
| Male Gender                 | 2,568 (56.8%)      | 226 (48.6%)        | -0.164 | 211 (51.0%)               | 209 (50.5%)        | -0.010 |
| BMI, kg/m <sup>2</sup>      |                    |                    |        |                           |                    |        |
| <18.5 kg/m <sup>2</sup>     | 1,081 (23.9%)      | 90 (19.4%)         | -0.110 | 78 (18.8%)                | 83 (20.0%)         | 0.031  |
| 18.5-24.9 kg/m <sup>2</sup> | 2,354 (52.0%)      | 303 (65.2%)        | 0.269  | 275 (66.4%)               | 265 (64.0%)        | -0.051 |
| 25.0-29.9 kg/m <sup>2</sup> | 414 (9.1%)         | 49 (10.5%)         | 0.047  | 39 (9.4%)                 | 45 (10.9%)         | 0.048  |
| ≥30 kg/m <sup>2</sup>       | 67 (1.5%)          | 9 (1.9%)           | 0.035  | 6 (1.4%)                  | 7 (1.7%)           | 0.019  |
| Missing                     | 609 (13.5%)        | 14 (3.0%)          | -0.387 | 16 (3.9%)                 | 14 (3.4%)          | -0.026 |
| Smoking                     | 1,316 (29.1%)      | 179 (38.5%)        | 0.200  | 158 (38.2%)               | 155 (37.4%)        | -0.015 |
| Barthel Index               |                    |                    |        |                           |                    |        |
| Total dependence            | 1,832(40.5%)       | 135(29.0%)         | -0.242 | 111 (26.8%)               | 118 (28.5%)        | 0.038  |
| Severe dependence           | 285(6.3%)          | 25(5.4%)           | -0.039 | 16 (3.9%)                 | 23 (5.6%)          | 0.080  |
| Moderate dependence         | 432(9.5%)          | 41(8.8%)           | -0.025 | 30 (7.2%)                 | 37 (8.9%)          | 0.062  |
| Mild dependence             | 470 (10.4%)        | 52 (11.2%)         | 0.026  | 52 (12.6%)                | 47 (11.4%)         | -0.037 |
| Independence                | 722 (16.0%)        | 126 (27.1%)        | 0.274  | 121 (29.2%)               | 111 (26.8%)        | -0.054 |
| Missing                     | 784 (17.3%)        | 86 (18.5%)         | 0.030  | 84 (20.3%)                | 78 (18.8%)         | -0.037 |
| JCS                         |                    |                    |        |                           |                    |        |
| 0 (alert)                   | 2,990 (66.1%)      | 368 (79.1%)        | 0.296  | 337 (81.4%)               | 325 (78.5%)        | -0.072 |
| 1-3 (drowsy)                | 1,086 (24.0%)      | 70 (15.1%)         | -0.227 | 59 (14.3%)                | 67 (16.2%)         | 0.054  |
| 10-30 (somnolence)          | 301 (6.7%)         | 17 (3.7%)          | -0.136 | 11 (2.7%)                 | 14 (3.4%)          | 0.042  |
| 100-300 (coma)              | 148 (3.3%)         | 10 (2.2%)          | -0.069 | 7 (1.7%)                  | 8 (1.9%)           | 0.018  |

## Admission year

|      |             |            |        |            |            |        |
|------|-------------|------------|--------|------------|------------|--------|
| 2010 | 191 (4.2%)  | 23 (4.9%)  | 0.035  | 19 (4.6%)  | 20 (4.8%)  | 0.011  |
| 2011 | 467 (10.3%) | 23 (4.9%)  | -0.203 | 20 (4.8%)  | 22 (5.3%)  | 0.022  |
| 2012 | 470 (10.4%) | 47 (10.1%) | -0.009 | 44 (10.6%) | 45 (10.9%) | 0.008  |
| 2013 | 445 (9.8%)  | 55 (11.8%) | 0.064  | 51 (12.3%) | 52 (12.6%) | 0.007  |
| 2014 | 621 (13.7%) | 65 (14.0%) | 0.007  | 49 (11.8%) | 56 (13.5%) | 0.051  |
| 2015 | 604 (13.3%) | 81 (17.4%) | 0.113  | 73 (17.6%) | 70 (16.9%) | -0.019 |
| 2016 | 794 (17.5%) | 80 (17.2%) | -0.009 | 68 (16.4%) | 67 (16.2%) | -0.007 |
| 2017 | 817 (18.1%) | 81 (17.4%) | -0.017 | 82 (19.8%) | 74 (17.9%) | -0.049 |
| 2018 | 116 (2.6%)  | 10 (2.2%)  | -0.027 | 8 (1.9%)   | 8 (1.9%)   | 0.000  |

## Hospital Volume

|                            |               |             |        |             |             |        |
|----------------------------|---------------|-------------|--------|-------------|-------------|--------|
| Low (<4)                   | 282 (6.2%)    | 0 (0.0%)    | -0.365 | 0 (0.0%)    | 0 (0.0%)    | 0.000  |
| Middle (4≤ & <14)          | 1,116 (24.7%) | 23 (4.9%)   | -0.578 | 19 (4.6%)   | 22 (5.3%)   | 0.033  |
| High (≥14)                 | 3,127 (69.1%) | 442 (95.1%) | 0.719  | 395 (95.4%) | 392 (94.7%) | -0.033 |
| Clinical training hospital | 3,644 (80.5%) | 399 (85.8%) | 0.141  | 354 (85.5%) | 358 (86.5%) | 0.028  |
| Emergent admission         | 3,894 (86.1%) | 372 (80.0%) | -0.162 | 321 (77.5%) | 330 (79.7%) | 0.053  |

**Comorbid conditions**

|                           |               |             |        |             |             |        |
|---------------------------|---------------|-------------|--------|-------------|-------------|--------|
| Hypertension              | 1,439 (31.8%) | 149 (32.0%) | 0.005  | 129 (31.2%) | 133 (32.1%) | 0.021  |
| Diabetes Mellitus         | 711 (15.7%)   | 80 (17.2%)  | 0.040  | 55 (13.3%)  | 64 (15.5%)  | 0.062  |
| Dyslipidemia              | 386 (8.5%)    | 51 (11.0%)  | 0.082  | 42 (10.1%)  | 42 (10.1%)  | 0.000  |
| Atrial Fibrillation       | 637 (14.1%)   | 61 (13.1%)  | -0.028 | 52 (12.6%)  | 52 (12.6%)  | 0.000  |
| Malignancy                | 365 (8.1%)    | 32 (6.9%)   | -0.045 | 35 (8.5%)   | 29 (7%)     | -0.054 |
| Chronic Pulmonary Disease | 197 (4.4%)    | 13 (2.8%)   | -0.084 | 16 (3.9%)   | 13 (3.1%)   | -0.039 |
| Chronic Liver Disease     | 130 (2.9%)    | 22 (4.7%)   | 0.097  | 18 (4.3%)   | 19 (4.6%)   | 0.012  |
| Chronic Renal Disease     | 428 (9.5%)    | 43 (9.2%)   | -0.007 | 51 (12.3%)  | 40 (9.7%)   | -0.085 |

**In-hospital Complications**

|               |               |             |       |             |             |        |
|---------------|---------------|-------------|-------|-------------|-------------|--------|
| Heart failure | 1,779 (39.3%) | 205 (44.1%) | 0.097 | 187 (45.2%) | 184 (44.4%) | -0.015 |
|---------------|---------------|-------------|-------|-------------|-------------|--------|

|                                                                 |               |             |        |             |             |        |
|-----------------------------------------------------------------|---------------|-------------|--------|-------------|-------------|--------|
| - NYHA II                                                       | 182 (4.0%)    | 24 (5.2%)   | 0.054  | 20 (4.8%)   | 23 (5.6%)   | 0.033  |
| - NYHA III                                                      | 153 (3.4%)    | 23 (4.9%)   | 0.078  | 21 (5.1%)   | 21 (5.1%)   | 0.000  |
| - NYHA IV                                                       | 166 (3.7%)    | 36 (7.7%)   | 0.176  | 29 (7%)     | 31 (7.5%)   | 0.019  |
| Stroke                                                          | 481 (10.6%)   | 61 (13.1%)  | 0.077  | 44 (10.6%)  | 52 (12.6%)  | 0.060  |
| Embolism                                                        | 89 (2.0%)     | 7 (1.5%)    | -0.035 | 6 (1.4%)    | 7 (1.7%)    | 0.019  |
| Shock                                                           | 53 (1.2%)     | 20 (4.3%)   | 0.193  | 14 (3.4%)   | 18 (4.3%)   | 0.050  |
| DIC                                                             | 154 (3.4%)    | 22 (4.7%)   | 0.067  | 20 (4.8%)   | 20 (4.8%)   | 0.000  |
| <b><i>Antibiotics for more than 2 weeks</i></b>                 |               |             |        |             |             |        |
| Penicillin system                                               | 1,517 (33.5%) | 213 (45.8%) | 0.253  | 186 (44.9%) | 187 (45.2%) | 0.005  |
| Cephem system                                                   | 1,178 (26.0%) | 178 (38.3%) | 0.264  | 164 (39.6%) | 155 (37.4%) | -0.045 |
| Carbapenem                                                      | 378 (8.4%)    | 80 (17.2%)  | 0.267  | 59 (14.3%)  | 66 (15.9%)  | 0.047  |
| Aminoglycoside                                                  | 979 (21.6%)   | 174 (37.4%) | 0.351  | 142 (34.3%) | 147 (35.5%) | 0.025  |
| Glycopeptide                                                    | 622 (13.7%)   | 161 (34.6%) | 0.502  | 129 (31.2%) | 134 (32.4%) | 0.026  |
| Daptomycin                                                      | 101 (2.2%)    | 29 (6.2%)   | 0.200  | 26 (6.3%)   | 25 (6.0%)   | -0.010 |
| Linezolid                                                       | 31 (0.7%)     | 14 (3.0%)   | 0.173  | 7 (1.7%)    | 8 (1.9%)    | 0.018  |
| Antifungal antibiotics                                          | 70 (1.5%)     | 32 (6.9%)   | 0.268  | 23 (5.6%)   | 21 (5.1%)   | -0.022 |
| <b><i>Intensive Treatment within 2 days after admission</i></b> |               |             |        |             |             |        |
| Admission to HCU                                                | 162 (3.6%)    | 16 (3.4%)   | -0.008 | 18 (4.3%)   | 15 (3.6%)   | -0.037 |
| Admission to ICU                                                | 219 (4.8%)    | 128 (27.5%) | 0.647  | 81 (19.6%)  | 83 (20%)    | 0.012  |
| Inotropic therapy                                               | 369 (8.2%)    | 131 (28.2%) | 0.537  | 87 (21%)    | 90 (21.7%)  | 0.018  |
| Ventilation Support                                             | 153 (3.4%)    | 84 (18.1%)  | 0.488  | 48 (11.6%)  | 48 (11.6%)  | 0.000  |
| CRRT                                                            | 30 (0.7%)     | 19 (4.1%)   | 0.226  | 17 (4.1%)   | 15 (3.6%)   | -0.025 |
| IRRT                                                            | 128 (2.8%)    | 17 (3.7%)   | 0.047  | 19 (4.6%)   | 15 (3.6%)   | -0.049 |
| PMX-DHP                                                         | 6 (0.1%)      | 1 (0.2%)    | 0.020  | 2 (0.5%)    | 1 (0.2%)    | -0.040 |

Data are expressed as the median [interquartile range] or number (percentage). SMD, standardized mean difference; BMI, Body mass index; JCS, Japan Coma Scale; NYHA, New York Heart Association; DIC, Disseminated intravascular coagulation; HCU, high care unit; ICU,

---

intensive care unit; CRRT, continuous renal replacement therapy; IRRT, intermittent renal replacement therapy; PMX-DHP, Polymyxin B-immobilized fiber column-direct hemoperfusion.

---
